# Supplementary material for: Biotite supports long-range diffusive transport in dissolution–precipitation creep in halite through small porosity fluctuations
Source: Copernicus journal article supplement (doi:10.5194/se-13-41-2022), 2022-01-10
Supplement: Supplementary file 1 [file se-13-41-2022-supplement.zip]

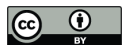

## *Supplement of*

# **Biotite supports long-range diffusive transport in dissolution–precipitation creep in halite through small porosity fluctuations**

**Berit Schwichtenberg et al.**

*Correspondence to:* Berit Schwichtenberg (berit.schwichtenberg@outlook.com)

- se-13-41-2022-supplement-title-page.pdf
- Supplementary
  - S1 Animation of effective DPC along NaCl-Bt grain boundary with progressing compaction of the sample (SBS).gif
  - S2 Exemplary correlation success of three consecutive datasets
    - \* Animation of the correlation status of the first correlation pair (18 - 62 h) in the pure NaCl sample.avi
    - \* Animation of the correlation status of the first correlation pair (19 - 59 h) in the SB sample.avi
    - \* Animation of the correlation status of the first correlation pair (28 - 67 h) in the SBS sample.avi
    - \* Animation of the correlation status of the last correlation pair (1343 - 1619 h) in the SBS sample.avi
    - \* Animation of the correlation status of the last correlation pair (1365 - 1932 h) in the SB sample.avi
    - \* Animation of the correlation status of the last correlation pair (512 - 1089 h) in the pure NaCl sample.avi
    - \* Explanation of correlation status in videos.pdf

The copyright of individual parts of the supplement might differ from the article licence.
